# Supplementary material for: SERS-based detection of an organochlorine pesticide through surface plasmon-induced C–C coupling
Source: Royal Society of Chemistry journal article supplement (doi:10.1039/d3en00123g), 2023-01-01
Supplement: d3en00123g1.pdf [file d3en00123g1.pdf]

## **Support Information for**

### **SERS-based Detection of an Organochlorine Pesticide Through Surface Plasmon-Induced C-C Coupling**

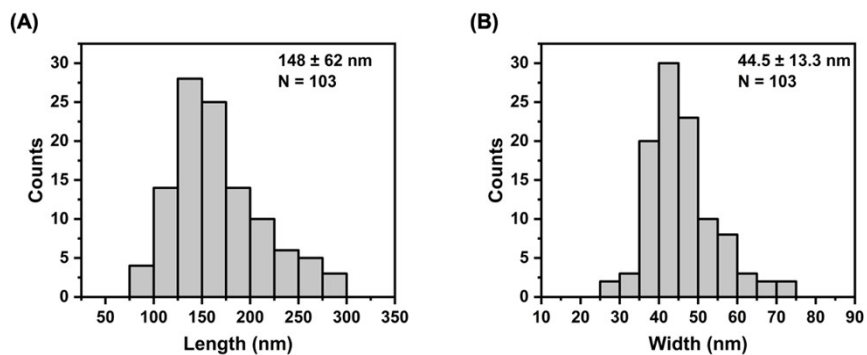

Figure S1. Particle size distributions for AgNRs (A) length and (B) width.

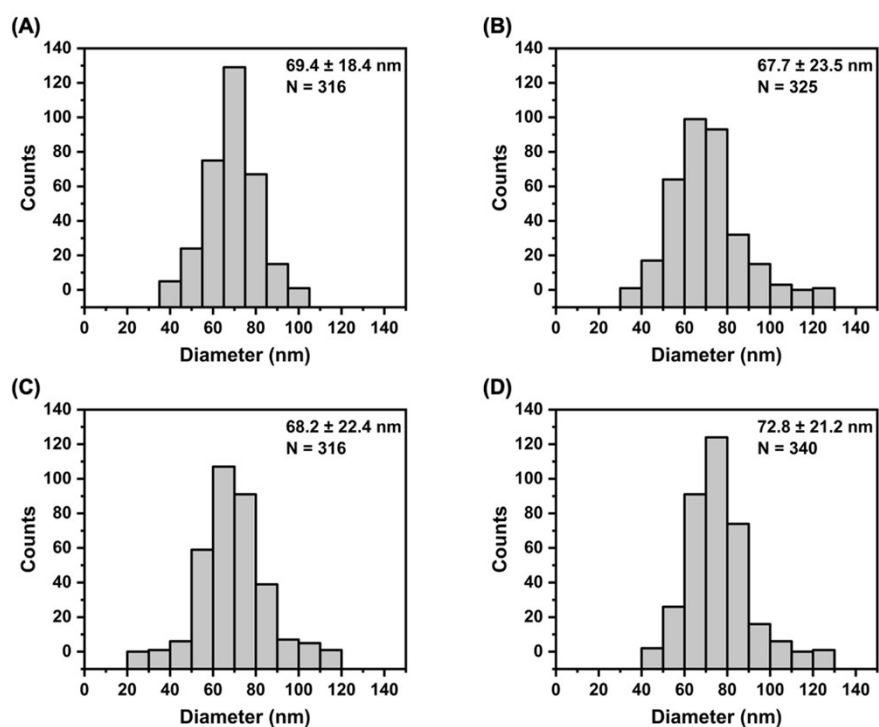

Figure S2. Particle size distributions for (A) AgNPs, (B) AgPd<sub>2.5 mol%</sub>NPs, (C) AgPd<sub>5.0 mol%</sub>NPs and (D) AgPd<sub>10 mol%</sub>NPs.

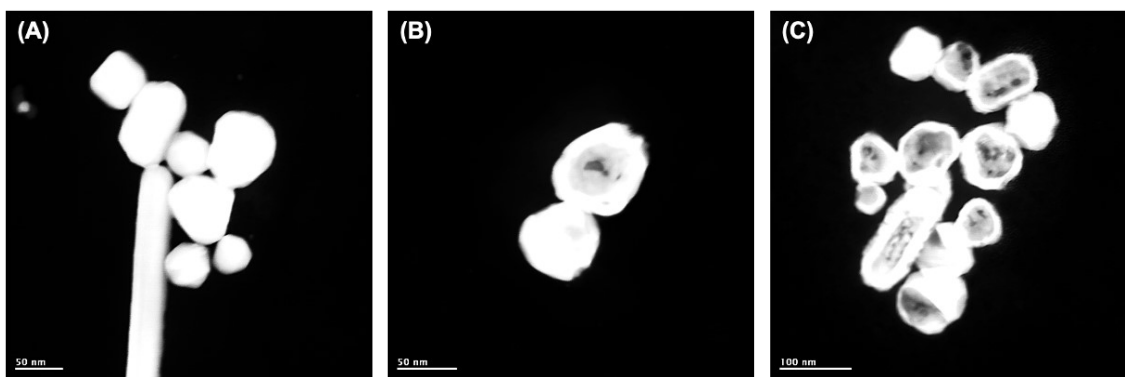

**Figure S3.** Representative HAADF-STEM for (A) AgPd<sub>2.5 mol%</sub>NPs, (B) AgPd<sub>5.0 mol%</sub>NPs, and (C) AgPd<sub>10 mol%</sub>NPs.

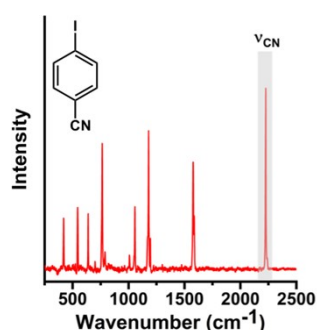

**Figure S4.** Ordinary Raman spectrum of 4-IBN powder.

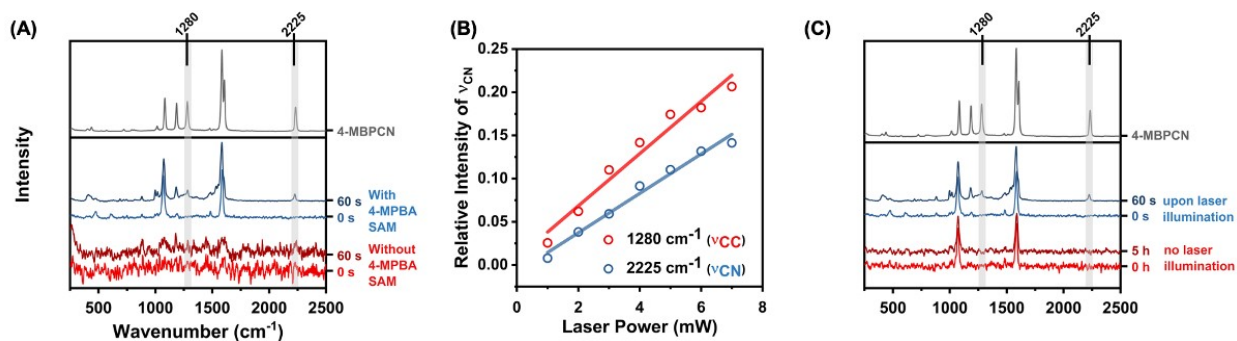

**Figure S5.** (A) SERS spectra of bare AgPd<sub>5.0 mol%</sub>NPs (red; without 4-MPBA SAM) and 4-MPBA-functionalized AgPd<sub>5.0 mol%</sub>NPs (blue; with 4-MPBA SAM) immersed in 5mM 4-IBN solution before (0 s) and after (60 s) 633 nm laser illumination. Power: 1.0 mW. The SERS spectrum of 4-MBPCN on AgPd<sub>5.0 mol%</sub>NPs is also shown at the top for reference. (B) Evolution of the relative intensities of the bands at 1285 and 2225 cm<sup>-1</sup> (assigned to 4-MBPCN) to that at 1072 cm<sup>-1</sup> (combined contribution of 4-MBPCN and 4-MPBA) as a function of incoming laser power, determined from the integrated intensity of  $\nu_{CC}$  and  $\nu_{CN}$  in Figure 2E. (C) SERS spectra of 4-MPBA-functionalized AgPd<sub>5.0 mol%</sub>NPs immersed in 5 mM 4-IBN solution kept in the dark (red, no laser illumination, at 0 h and 5 h) and kept under 633 nm laser irradiation (blue, upon laser illumination, at 0 s and 60 s). Power: 1.0 mW. The SERS spectrum of 4-MBPCN on AgPd<sub>5.0 mol%</sub>NPs is also shown at the top for reference.

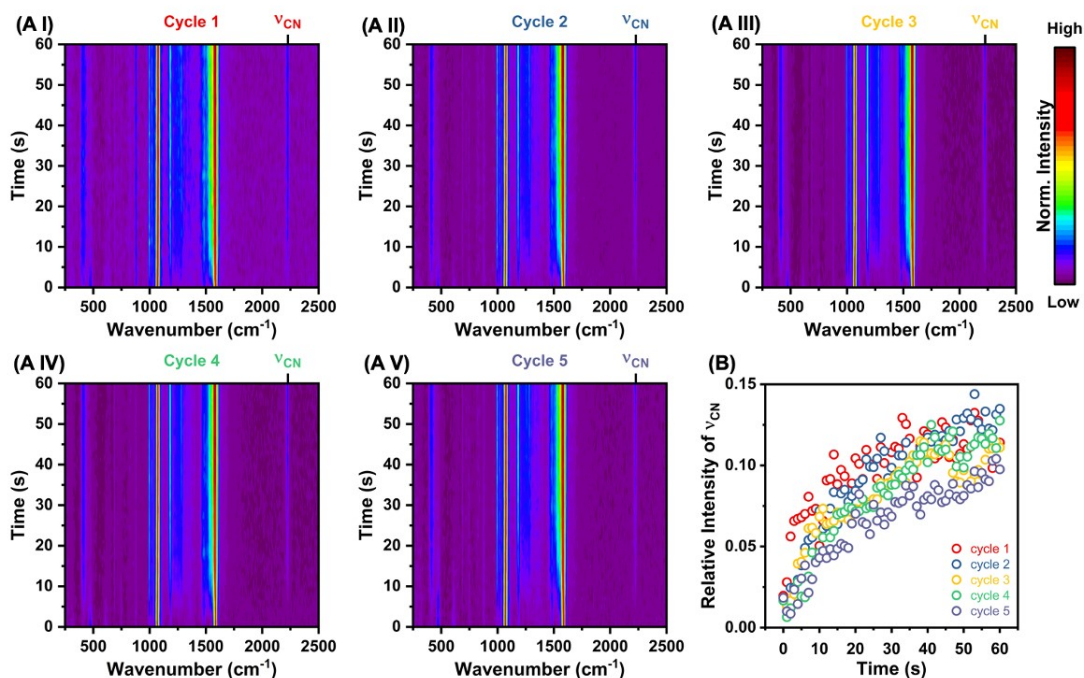

**Figure S6.** (A) Time-dependent in situ SERS spectra of the Suzuki-Miyaura coupling for 4-MPBA SAM on AgPd<sub>5.0 mol%</sub>NPs in 5 mM 4-IBN solution upon exposure to 633 nm laser illumination over (A I-AV) 5 cycles of reactions. Power: 1.0 mW. (B) Temporal evolution of the relative intensity of the band at 2225 cm<sup>-1</sup> (assigned to 4-MBPCN) to that at 1072 cm<sup>-1</sup> (combined contribution of 4-MBPCN and 4-MPBA) over 5 cycles of reactions.

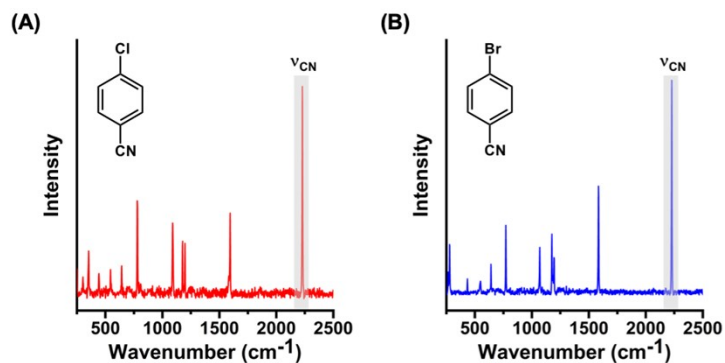

**Figure S7.** Ordinary Raman spectrum of (A) 4-CBN and (B) 4-BBN powder.

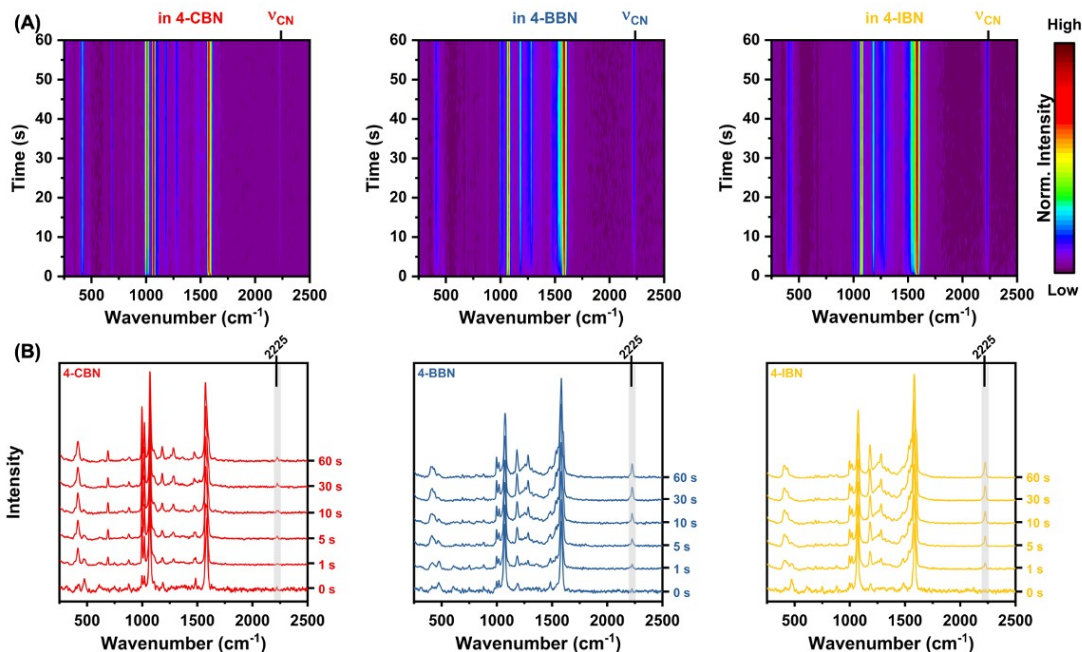

**Figure S8.** (A) Time-dependent in situ SERS spectra of the Suzuki-Miyaura coupling for 4-MPBA SAM on AgPd<sub>5.0 mol%</sub>NPs in 10 mM 4-CBN, 4-BBN and 4-IBN solution upon exposure to 633 nm laser illumination. Power: 1.0 mW. (B) SERS spectra recorded at selected time intervals during Suzuki-Miyaura reaction.

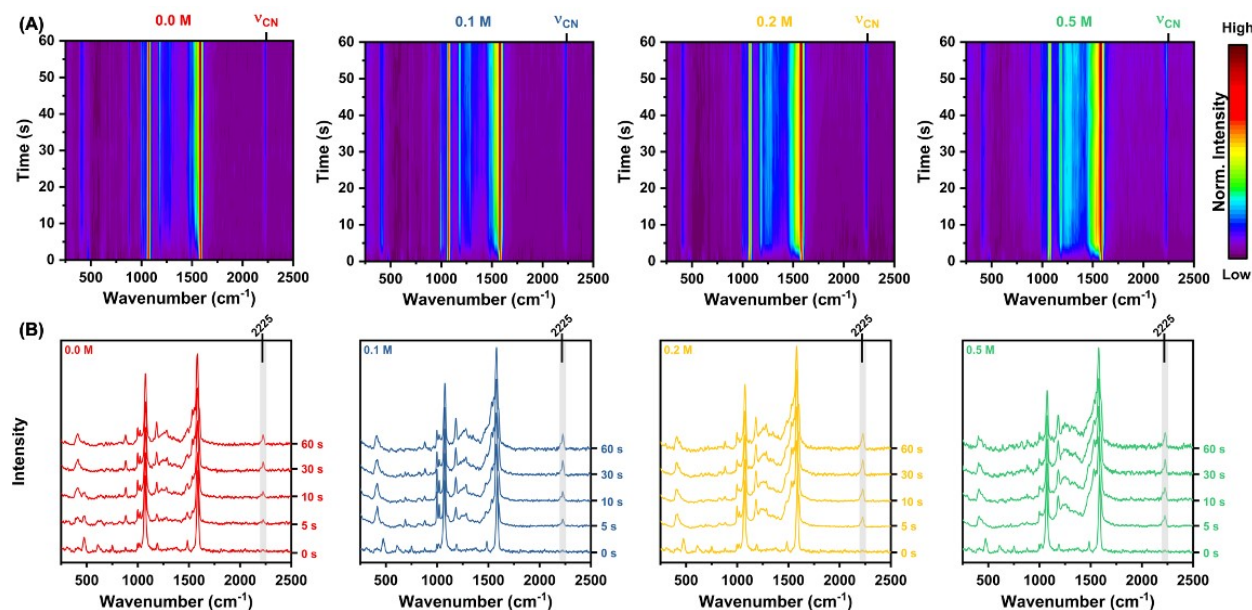

**Figure S9.** (A) Time-dependent in situ SERS spectra of the Suzuki-Miyaura coupling for 4-MPBA SAM on AgPd<sub>5.0 mol%</sub>NPs in 5 mM 4-IBN alkaline solution upon exposure to 633 nm laser illumination after addition of 0.0; 0.1; 0.2 and 0.5 M NaOH. Power: 1.0 mW. (B) SERS spectra recorded at selected time intervals during Suzuki-Miyaura reaction.



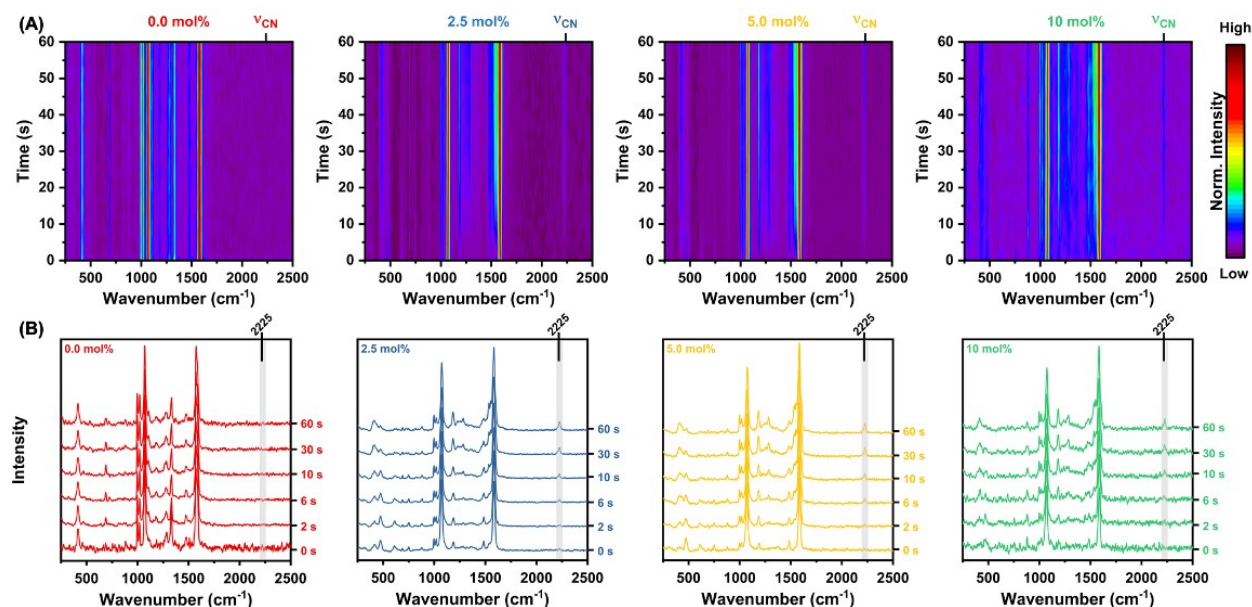

**Figure S10.** (A) Time-dependent in situ SERS spectra of the Suzuki-Miyaura coupling for 4-MPBA SAM on AgPd<sub>x mol%</sub>NPs ( $x = 0.0$ ; 2.5; 5.0 and 10 mol%) in 5 mM 4-IBN solution upon exposure to 633 nm laser illumination. Power: 1.0 mW. (B) SERS spectra recorded at selected time intervals during Suzuki-Miyaura reaction.

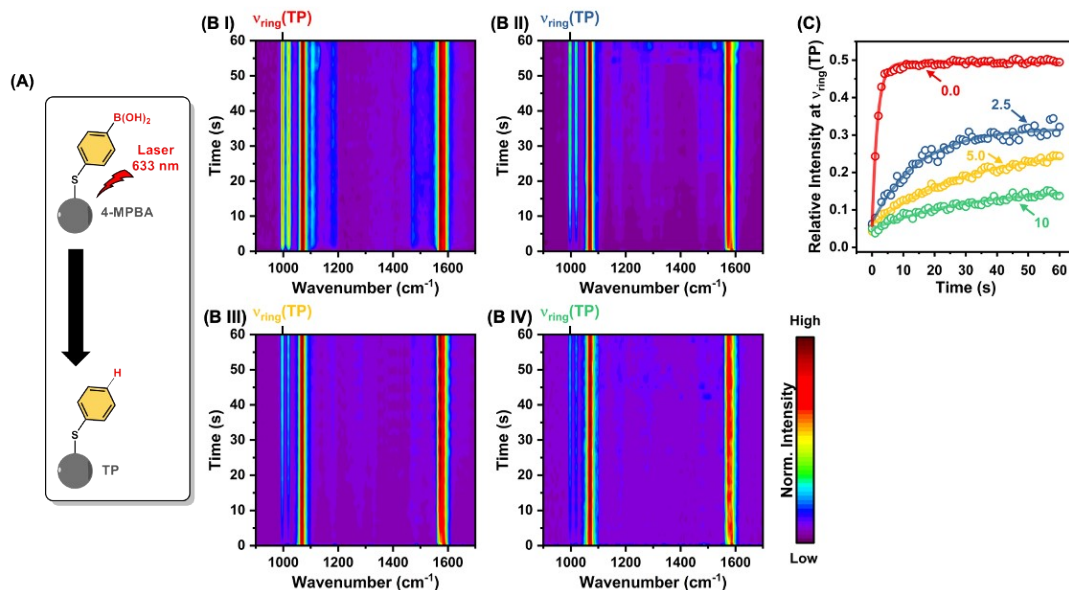

**Figure S11.** (A) Schematic illustration of SP-induced protodeboronation of 4-MPBA to TP on AgPd<sub>x mol%</sub>NPs surfaces. (B) Time-dependent in situ SERS spectra of the protodeboronation of 4-MPBA SAM on (B I) AgNPs, (B II) AgPd<sub>2.5 mol%</sub>NPs, (B III) AgPd<sub>5.0 mol%</sub>NPs, and (B IV) AgPd<sub>10 mol%</sub>NPs under air upon exposure to 633 nm laser illumination. Power: 1.0 mW. (C) Temporal evolution of the relative intensity of the band 999 cm<sup>-1</sup> (assigned to TP) to that at 1072 cm<sup>-1</sup> (combined contribution of TP and 4-MPBA) as a function of the Pd loading on AgPd<sub>x mol%</sub>NPs.

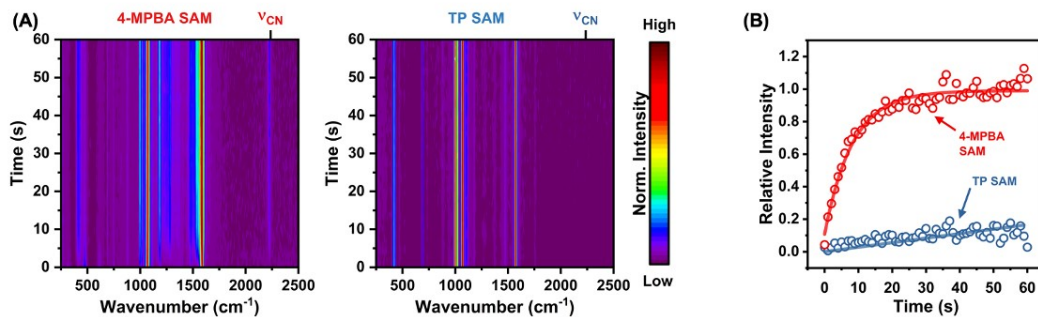

**Figure S12. (A)** Time-dependent in situ SERS spectra of the Suzuki-Miyaura coupling for 4-MPBA SAM (left, red) and TP SAM (right, blue) on AgPd<sub>5.0 mol%</sub> NPs in 5 mM 4-IBN solution upon exposure to 633 nm laser illumination. Power: 1.0 mW. **(B)** Temporal evolution of the relative intensity of the band at 2225 cm<sup>-1</sup> (assigned to 4-MBPCN) to that at 1072 cm<sup>-1</sup> (combined contribution of 4-MBPCN and 4-MPBA) for 4-MPBA SAM (red) and TP SAM (blue) on AgPd<sub>5.0 mol%</sub> NPs.

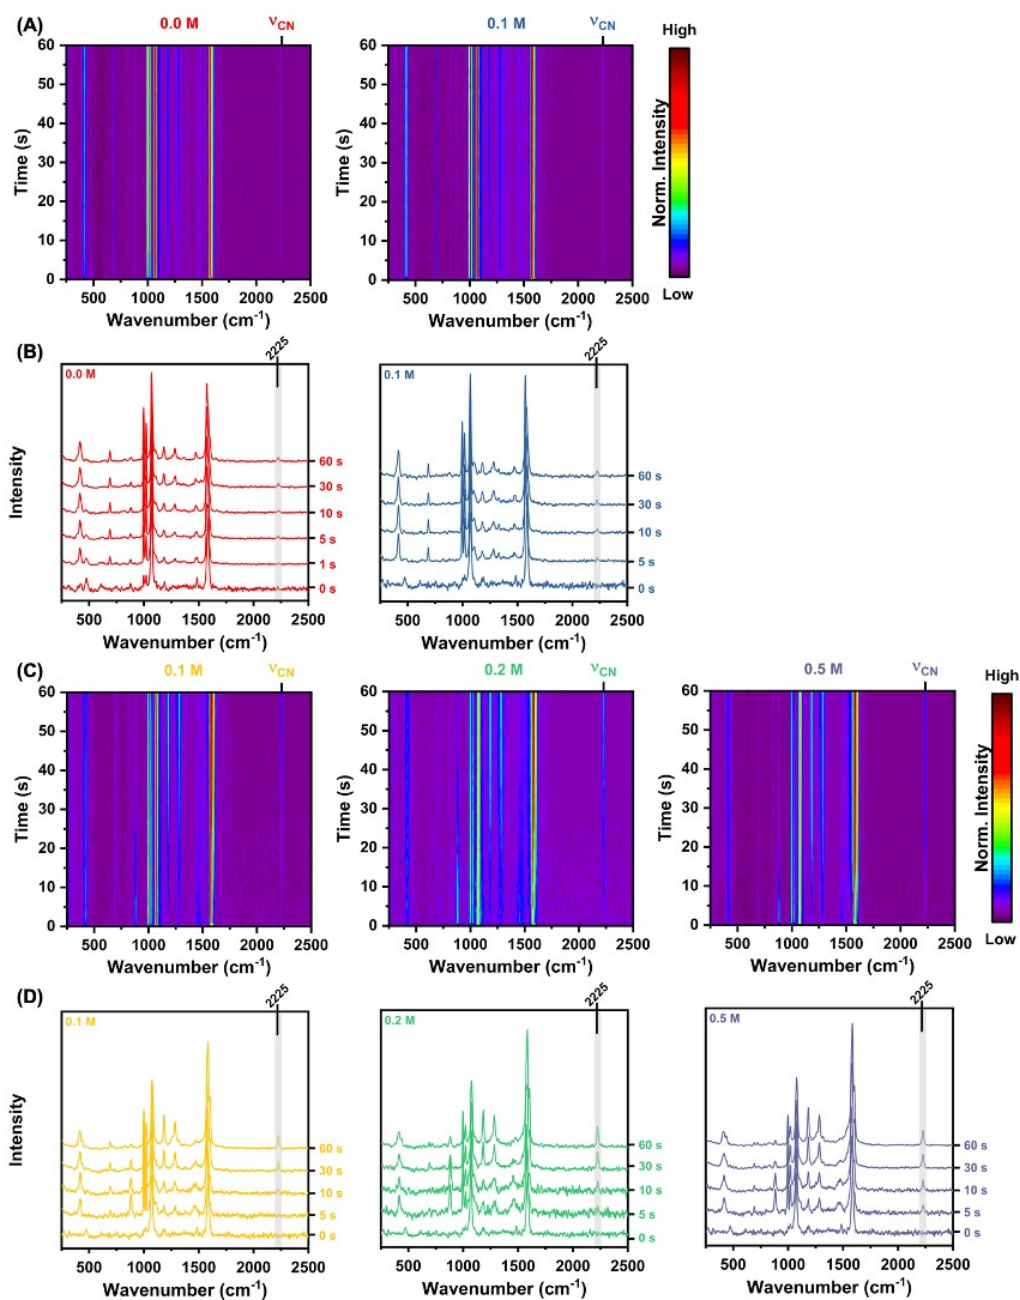

**Figure S13. (A)** Time-dependent in situ SERS spectra of the Suzuki-Miyaura coupling for 4-MPBA SAM on AgPd<sub>5.0 mol%</sub>NPs in 5 mM 4-CBN solution upon exposure to 633 nm laser illumination after addition of 0.0 and 0.1 M NaOH. Power: 1.0 mW. **(B)** SERS spectra recorded at selected time intervals during Suzuki-Miyaura reaction at incoming laser power equal to 1.0 mW. **(C)** Time-dependent in situ SERS spectra of the Suzuki-Miyaura coupling for 4-MPBA SAM on AgPd<sub>5.0 mol%</sub>NPs in 5 mM 4-CBN solution upon exposure to 633 nm laser illumination after addition of 0.1; 0.2 and 0.5 M NaOH. Power: 5.0 mW. **(D)** SERS spectra recorded at selected time intervals laser during Suzuki-Miyaura reaction at incoming laser power equal to 5.0 mW.



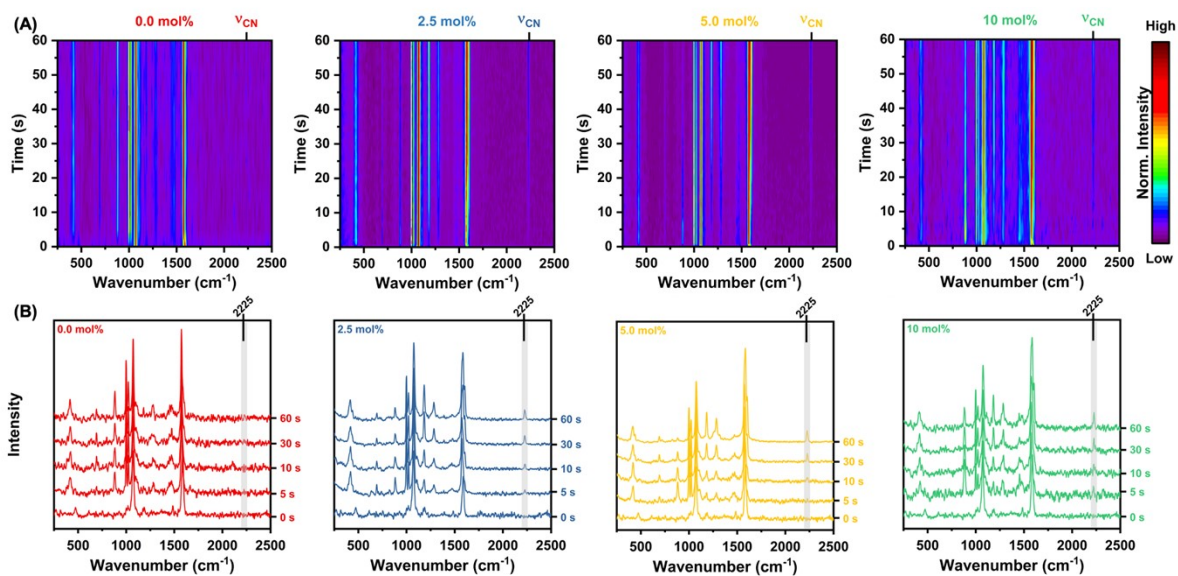

**Figure S14.** (A) Time-dependent in situ SERS spectra of the Suzuki-Miyaura coupling for 4-MPBA SAM on AgPd<sub>x mol%</sub>NPs (x = 0.0; 2.5; 5.0 and 10 mol%) in 5 mM 4-CBN alkaline solution (0.1 M NaOH) upon exposure to 633 nm laser illumination. Power: 5.0 mW. (B) SERS spectra recorded at selected time intervals during Suzuki-Miyaura reaction.

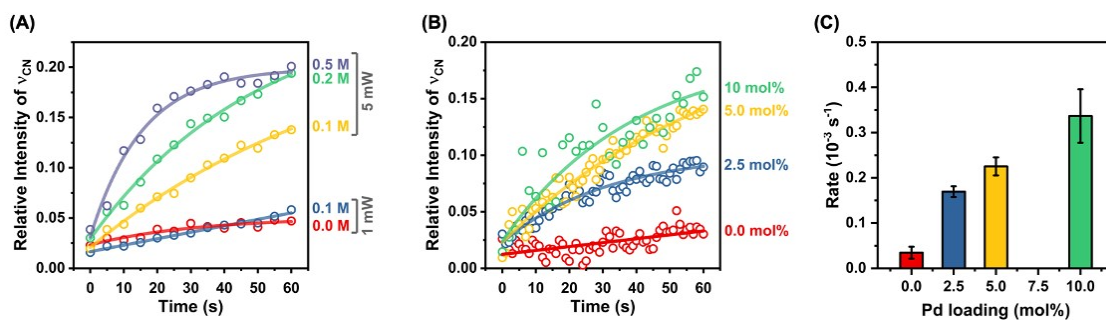

**Figure S15.** Temporal evolution of the relative intensity of the band  $2225\text{ cm}^{-1}$  (feature peak of 4-MBPCN) to that at  $1072\text{ cm}^{-1}$  (contributed from both 4-MBPCN and 4-MPBA) as a function of (A) the NaOH concentration in a 5 mM 4-CBN alkaline solution at incoming 1.0 and 5.0 mW incoming laser power; and (B) the Pd loading on 4-MPBA-functionalized AgPd<sub>x mol%</sub>NPs in 5 mM 4-CBN alkaline solution (0.1 M NaOH). Power: 5.0 mW. (C) SP-induced Suzuki-Miyaura reaction rate as a function of the Pd loading on AgPd<sub>x mol%</sub>NPs, determined from the slope of the initial linear portion of SERS intensity-time profiles in Figure S15B.

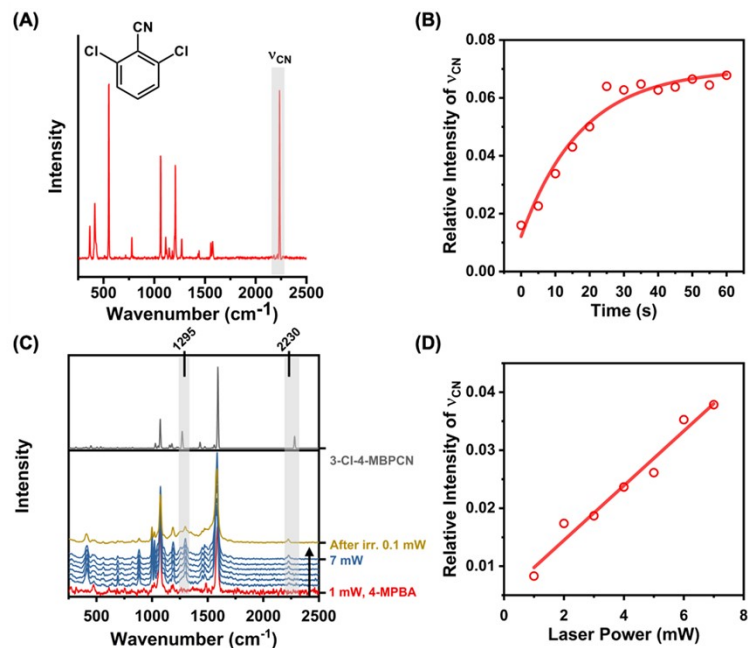

**Figure S16.** (A) Ordinary Raman spectrum of dichlobenil powder. (B) Temporal evolution of the relative intensity of the band at 2225  $\text{cm}^{-1}$  (assigned to 4-MBPCN) to that at 1072  $\text{cm}^{-1}$  (combined contribution of 4-MBPCN and 4-MPBA) for 4-MPBA SAM on  $\text{AgPd}_{5.0 \text{ mol}\%}$  NPs in 5.0 mM dichlobenil alkaline solution (0.1 M NaOH). (C) Laser power-dependent SERS spectra of 4-MPBA SAM on  $\text{AgPd}_{5.0 \text{ mol}\%}$  NPs in 5.0 mM dichlobenil alkaline solution (0.1 M NaOH). Integration time: 1.0 s. The intensity is normalized by the 1072  $\text{cm}^{-1}$  Raman peak. (D) Evolution of the relative intensity of the band at 2225  $\text{cm}^{-1}$  (assigned to 4-MBPCN) to that at 1072  $\text{cm}^{-1}$  (combined contribution of 4-MBPCN and 4-MPBA) as a function of incoming laser power, determined from the integrated intensity of  $\nu_{\text{CN}}$  in Figure S16B.
